# Supplementary material for: Highly efficient homojunction organic light-emitting diodes
Source: Royal Society of Chemistry journal article supplement (doi:10.1039/c5tc01189b), 2015-01-01
Supplement: c5tc01189b1.pdf [file c5tc01189b1.pdf]

Electronic Supplementary Information

**Highly efficient homojunction organic light-emitting diodes**

Qiang Wang,<sup>\*a</sup> Yali Zhao,<sup>a</sup> Panlong Qiu,<sup>a</sup> Chao Wu,<sup>a</sup> Jiangshan Chen<sup>b</sup> and Dongge Ma<sup>\*b</sup>

<sup>a.</sup> *School of Materials Science and Engineering, Shaanxi Normal University, Xi'an 710062, P. R. China.*

*E-mail: qiangwang@snnu.edu.cn.*

<sup>b.</sup> *State Key Laboratory of Polymer Physics and Chemistry, Changchun Institute of Applied Chemistry, University of Chinese Academy of Sciences, Changchun 130022, P. R. China. E-mail:*

*mdg1014@ciac.ac.cn.*

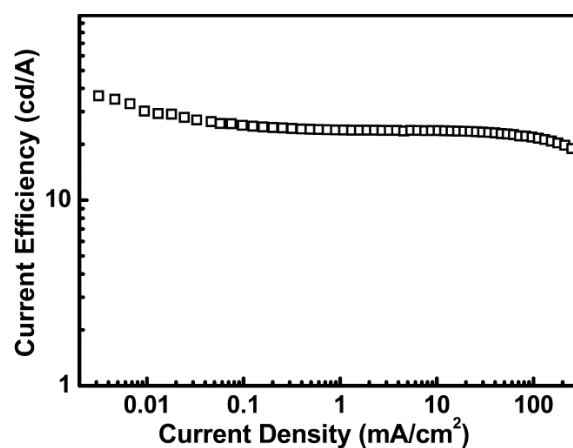

Fig. S1 Current efficiency versus current density of the blue *p-i-n* homojunction TOLED.

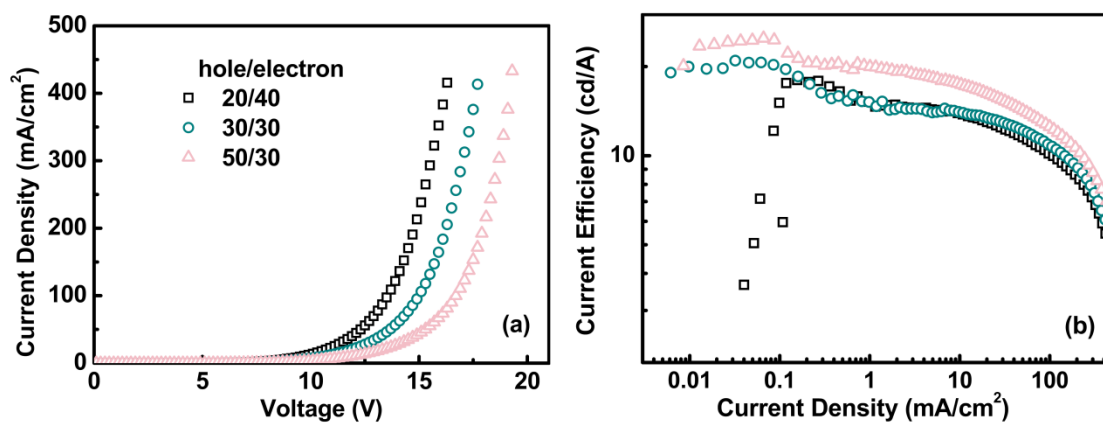

Fig. S2 (a) *J-V* and (b) current efficiency characteristics of the WOLEDs with different thicknesses of transport layers.

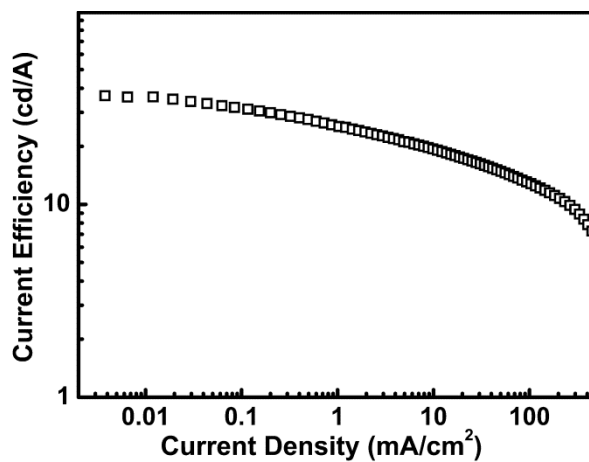

Fig. S3 Current efficiency versus current density of the optimized WOLED.
